# Supplementary material
Source: publisher site journal article supplement (https://www.dovepress.com/article/251965)
Supplement: Supplementary file 1 [file get_supplementary_file.php]

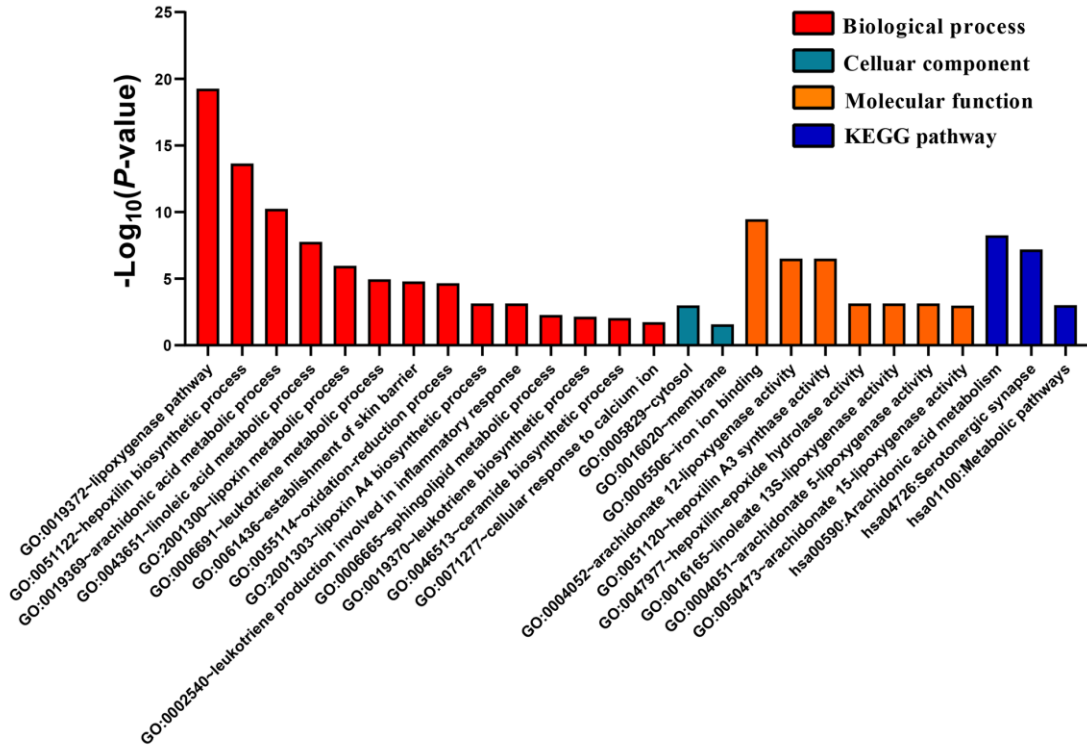

Figure S1. The biological function of GO term and KEGG analysis of all the *ALOX* family genes. GO term enrichment of *ALOX* genes: (A) for BP; (B) for MF; (C) for CC. (D) KEGG enrichment of *ALOX* genes. *ALOX*: *Lipoxygenases*; GO: gene ontology; KEGG: Kyoto Encyclopedia of Genes and Genomes; MF: molecular function; CC: cellular component; BP: biological process.

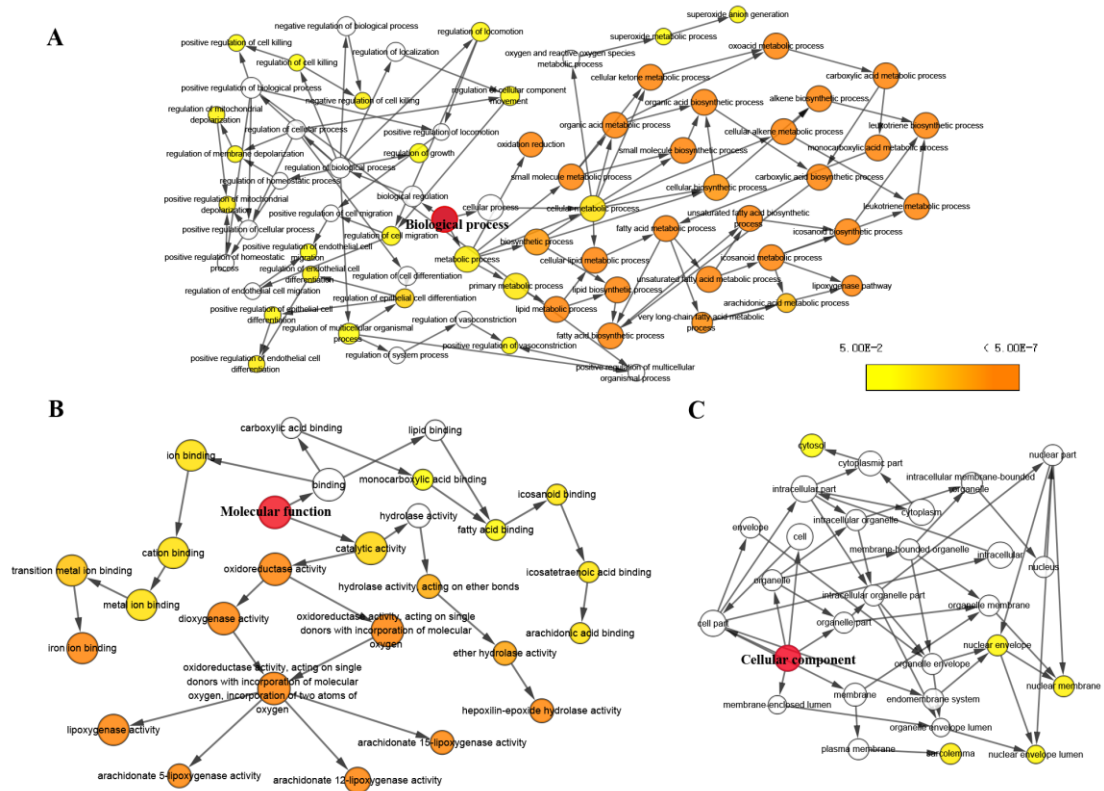

Figure S2. Enriched Gene Ontology directed acyclic graph of *ALOX* family genes. (A) The biological process (BP) of GO terms; (B) The molecular function (MF) of GO terms; (C) The molecular function (CC) of GO terms. *ALOX*: *Lipoxygenases*, GO: gene ontology; KEGG: Kyoto Encyclopedia of Genes and Genomes.
